# Supplementary material
Source: publisher figshare collection journal article supplement (https://tandf.figshare.com/articles/dataset/_/12465194)

**Figure S1. Study flow chart.** According to government statistics, the number of people eligible for disability support before November 2017 was estimated as 1,123,034.

SCZD, schizophrenia; HL, hearing loss; HNC, head and neck cancer; CHF, congestive heart failure; LC, liver cirrhosis; CKD, chronic kidney disease

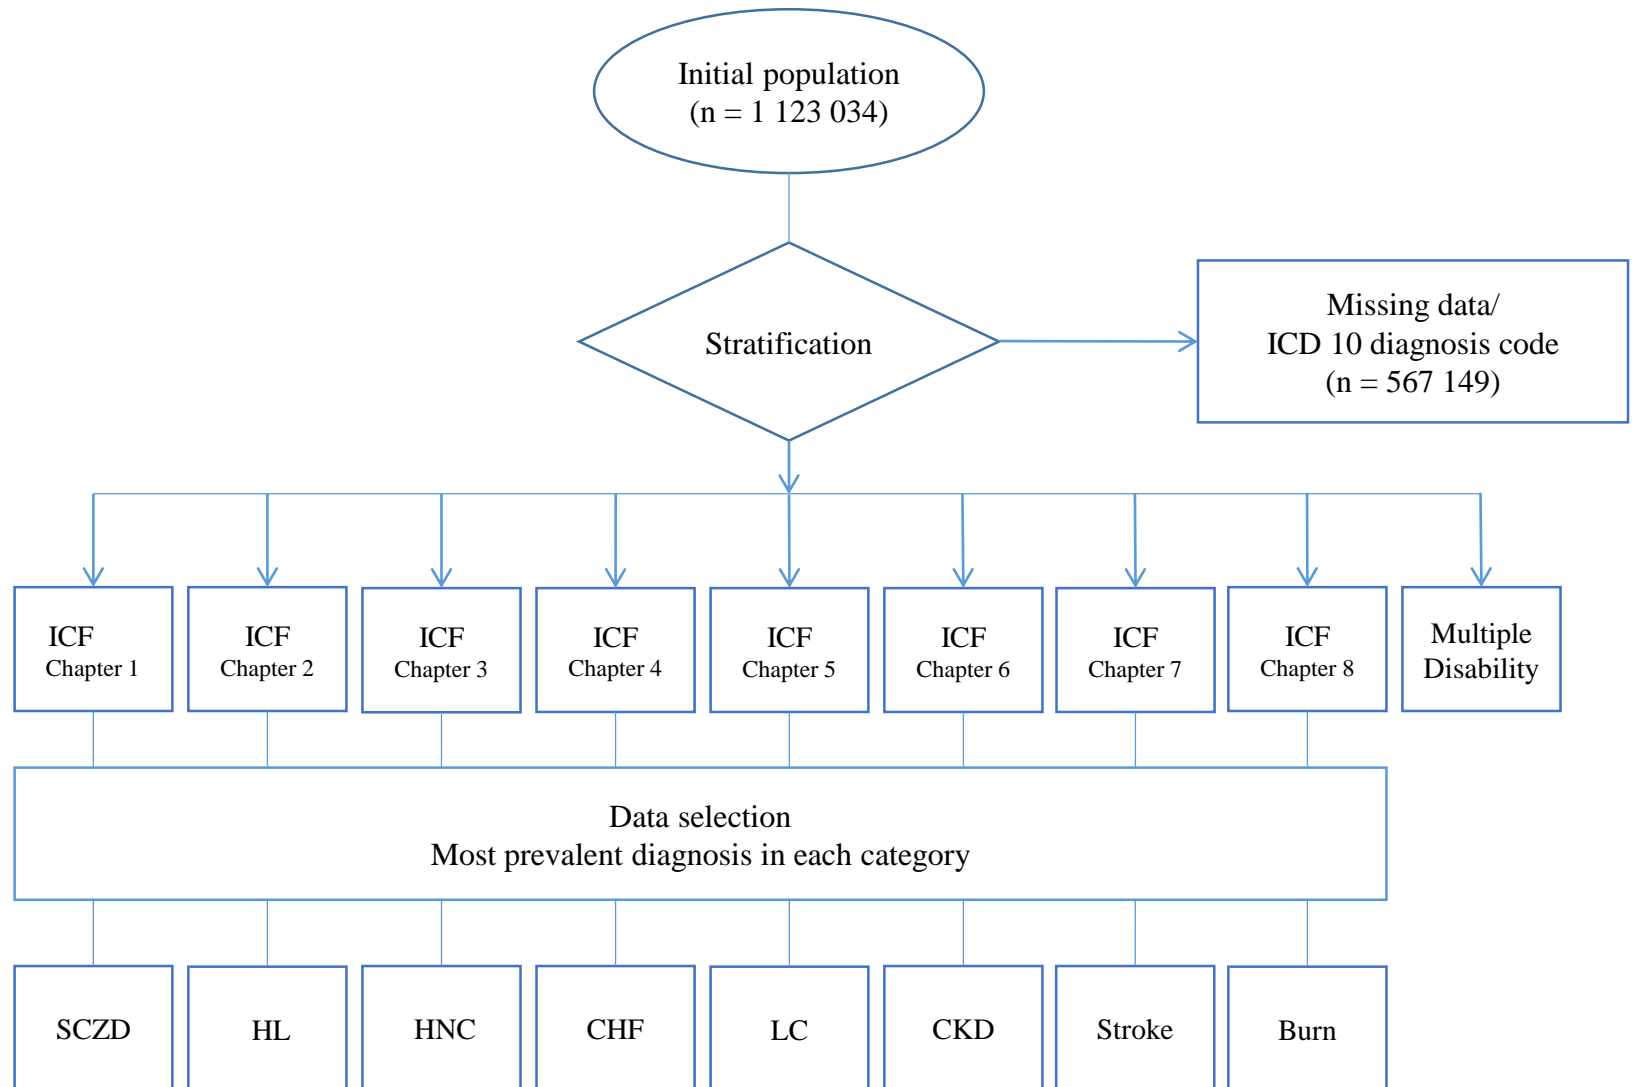

Supplement: Supplementary file 1 [file 1]
